# Supplementary material
Source: Springer Nature journal article supplement (https://www.springermedizin.de/resource/supplementary/13223_2012_316_MOESM3_ESM.pdf/9597682)

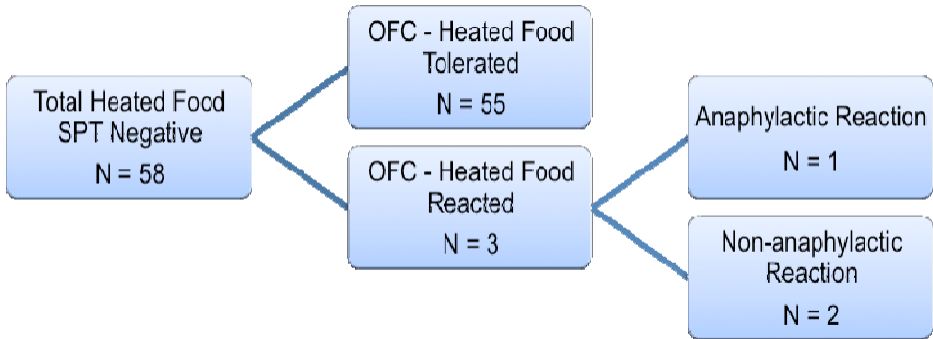

Supplement: MOESM3 [file 9597682]
